# Supplementary material for: Species richness in the Northeast US Continental Shelf ecosystem: Climate-driven trends and perturbations
Source: PLOS journal article supplement (doi:10.1371/journal.pclm.0000557), 2025-01-03
Supplement: S1 (10.1371/journal.pclm.0000557.s001) [file journal.pclm.0000557.s001]

**S1 Table. Scientific names of species from core strata areas of the NES used in the study.**

Listing of species names used in the study with Taxonomic Group (vertebrates “V” or invertebrates “I” and Osteichthyes “O”, Chondrichthyes “C”, or neither “N”) and Functional Group (benthivores “Be”, piscivores “Pi”, and planktivores “Pl”) designations. .
